# Supplementary material for: Competitive Value of Acquiring Novel FDA Product Codes for Medical Device Manufacturers An Original Investigation
Source: Research Square preprint supplement (doi:10.21203/rs.3.rs-6754717/v1), 2025-06-02
Supplement: Supplementary file 1 [file 2a7b9dd22a99b2ef0340243b.pdf]

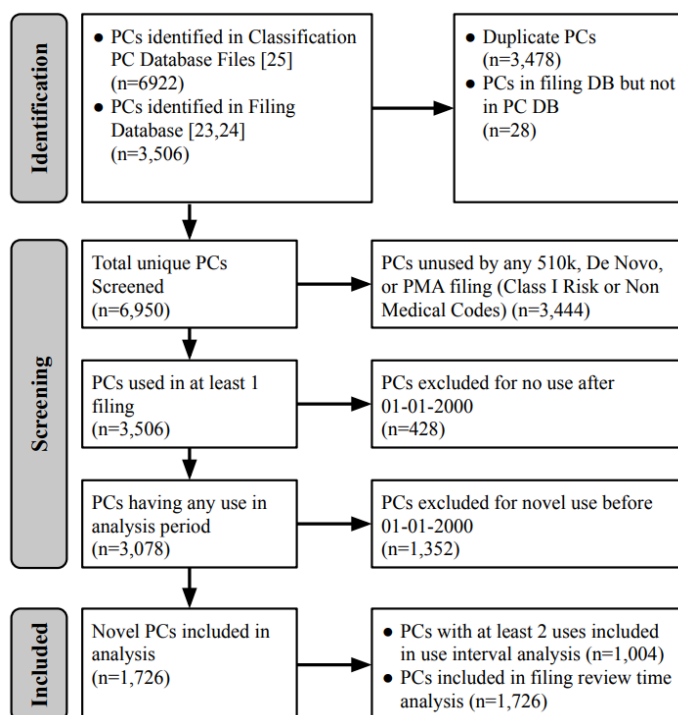

**Figure S1: PRISMA Diagram of Product Code and Filing Data Sources and Screening Criteria.**

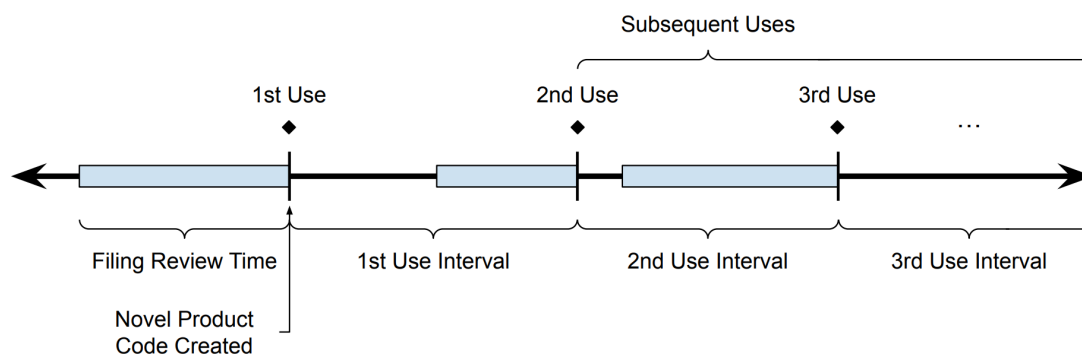

**Figure S2: Novel PC Lifetime Visual Glossary.** Schematic representation of the timeline of filing activity and use for a hypothetical novel PC over its lifetime in 3+ filings. The Filing Review Time of a filing is indicated as a blue box and represents the period from the initial receipt of a manufacturer's filing by the FDA, to the date the FDA renders their clearance decision. Discrete uses of a PC are indicated as diamond markers above the timeline, and PC use ordinality is established by priority of the decision dates. Use intervals are the time between the sequential uses of a product code. Subsequent uses of a product code refers to all uses beyond the 1st novel use. Subsequent use intervals refer to all use intervals after the 1st use interval.

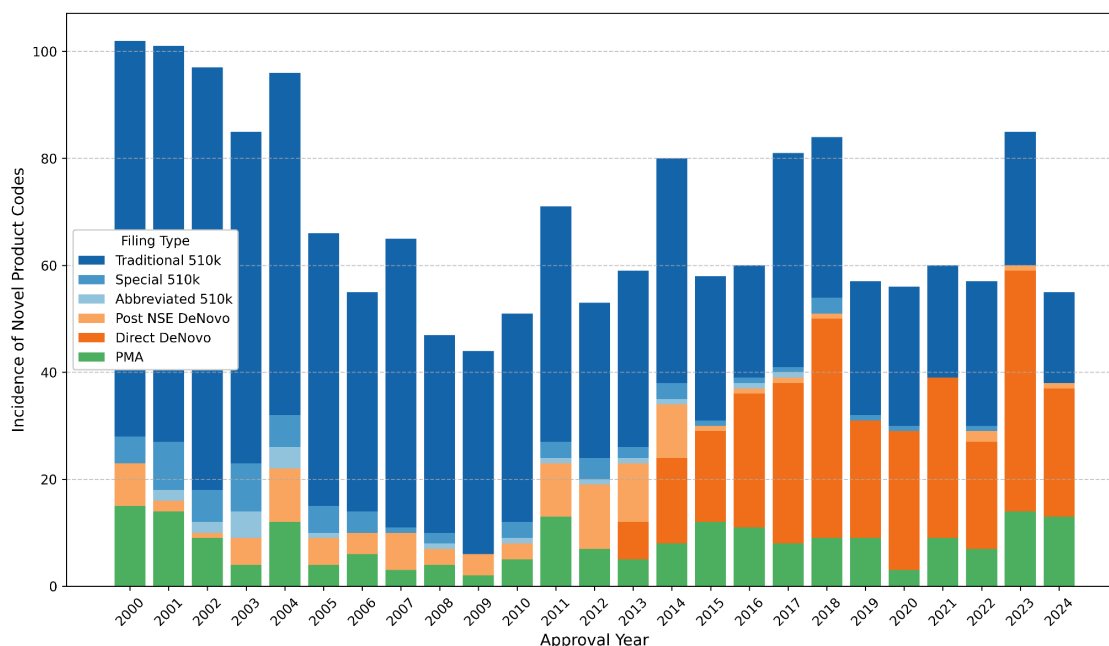

**Figure S3: Yearly Incidence of Novel PCs by Filing Type.** Stacked bars indicate the total incidence of novel product codes per binned decision year. Colored sub bars indicate the incidence of novel product codes contributed by each filing type and subtype. The decision year and initial filing type of a novel code is determined by the decision date for the first filing of any type referring to their unique 3 letter code.

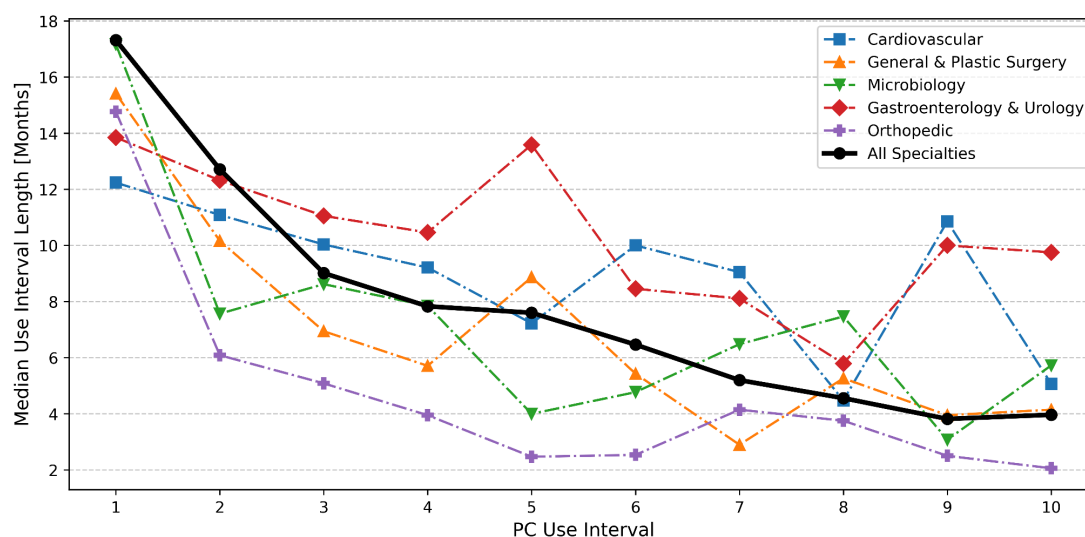

**Figure S4: Progression of Median Use Interval Length vs PC Use Interval for Top 5 Medical Specialties and All Medical Specialties Over the First 10 Use Intervals.** The median use interval length is the median time between two uses of a PC. The 1st use interval is the period of time between the 1st and 2nd use of a PC. The downward plateauing trend of all specifically analyzed medical specialties and all specialties in general indicates the normalization of use of novel product codes as they mature, and are used in medical device filings with an increasing regularity.
